# Supplementary material for: Improved photodynamic activity of a dual phthalocyanine–ALA photosensitiser
Source: Royal Society of Chemistry journal article supplement (doi:10.1039/c6nj02073a), 2016-01-01
Supplement: c6nj02073a1.pdf [file c6nj02073a1.pdf]

Electronic Supplementary Information

New Journal of Chemistry

**Improved Photodynamic activity of a dual Phthalocyanine-Ala photosensitizer**

C. Pavani,<sup>a,\*</sup> C.M.L. Francisco,<sup>a</sup> N.R.S. Gobo,<sup>b</sup> K.T. de Oliveira,<sup>b</sup> M.S. Baptista<sup>c</sup>

<sup>a</sup>Programa de Pós-graduação em Biofotônica Aplicada às Ciências da Saúde, Universidade Nove de Julho, São Paulo, Brasil.

<sup>b</sup>Departamento de Química, Centro de Ciências Exatas e de Tecnologia - Universidade Federal de São Carlos, São Carlos, Brasil.

<sup>c</sup>Departamento de Bioquímica, Instituto de Química – Universidade de São Paulo, São Paulo, Brasil.

**Quantification of endogenous production of PPIX from 2**

The integrated emissions that arose from those cells that were treated with the ALA and due to the PPIX production were used to prepare an analytical curve (Figure S1). The PPIX fluorescence that was generated by compound 2 was presented as an ALA Equivalent Fluorescent Intensity (AEFI), i.e., the ALA concentrations that resulted in the same fluorescent intensity that was found in the samples. In order to make the calculations for each sample of cells that had been treated with compound 2 and that had had the integrated emission calculated from the fluorescent spectra, the AEFI was calculated by substituting this value with the equation presented at (Figure S1).

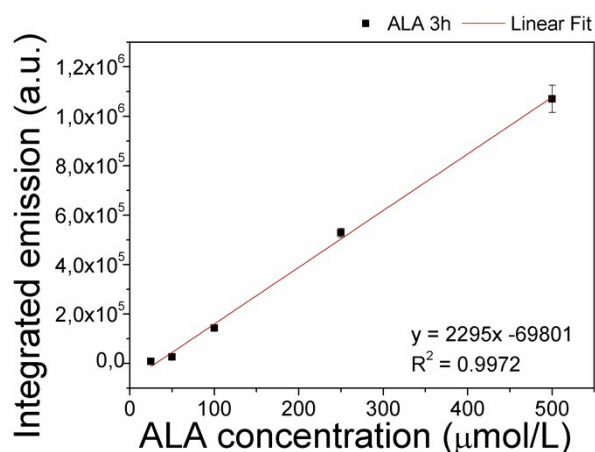

**Figure S1: The ALA Analytical Curve.** The cells that had been treated with ALA concentrations that ranged from 0-500μmol/L for 3 hours and had had the PPIX extracted with 5% HCl were measured by fluorescence (exc 406nm; emission 500-750nm).
